# Supplementary material for: Functional Capacity Evaluation in Different Societal Contexts: Results of a Multicountry Study
Source: Springer Nature journal article supplement (doi:10.1007/s10926-018-9782-x), 2018-05-25
Supplement: MOESM2 [file 15792894]

## ELECTRONIC SUPPLEMENTARY MATERIAL

**Title:** Functional Capacity Evaluation in different societal contexts: Results of a multicountry study.

**Journal:** Journal of occupational rehabilitation.

**Authors:** Jone Ansuategui Echeita, Matthias Bethge, Berry J. van Holland, Douglas P. Gross, Jan Kool, Peter Oesch, Maurizio A. Trippolini, Elizabeth Chapman, Andy S.K. Cheng, Robert Sellars, Megan Spavins, Marco Streibelt, Peter van der Wurff, Michiel F. Reneman.

**Corresponding Author:** Jone Ansuategui Echeita, University of Groningen, University Medical Center Groningen, Department of Rehabilitation Medicine, Groningen, The Netherlands. Email: [j.ansuategui.echeita@umcg.nl](mailto:j.ansuategui.echeita@umcg.nl)

**Online Resource 2** Patients' and clinicians' characteristics per country; mean  $\pm$  SD or n (%) are shown.

|                                           |                              | NL                | CA               | CH                | DE                | AT               | ZA                | NZ                | CN               |
|-------------------------------------------|------------------------------|-------------------|------------------|-------------------|-------------------|------------------|-------------------|-------------------|------------------|
| Floor-to-Waist Lift Performance (kg)      |                              | 23.8 $\pm$ 12.7   | 9.9 $\pm$ 7.5    | 19.4 $\pm$ 8.5    | 19.1 $\pm$ 8.8    | 23.5 $\pm$ 4.5   | 12.7 $\pm$ 8.7    | 20.3 $\pm$ 12.8   | 12.4 $\pm$ 5.7   |
| Six Minute Walk Test Performance (m)      |                              | 514.7 $\pm$ 122.7 | 468.0 $\pm$ 97.5 | 535.6 $\pm$ 123.5 | 393.8 $\pm$ 166.8 | 547.0 $\pm$ 67.4 | 413.7 $\pm$ 169.7 | 458.1 $\pm$ 173.7 | 361.8 $\pm$ 89.0 |
| Right Handgrip Strength Performance (kgF) |                              | 34.1 $\pm$ 14.2   | 26.6 $\pm$ 15.4  | 38.4 $\pm$ 13.5   | 34.2 $\pm$ 13.9   | 35.3 $\pm$ 14.4  | 27.1 $\pm$ 13.3   | 48.0 $\pm$ 23.4   | 25.5 $\pm$ 7.7   |
| Left Handgrip Strength Performance (kgF)  |                              | 32.0 $\pm$ 13.6   | 22.0 $\pm$ 15.0  | 36.0 $\pm$ 13.3   | 33.0 $\pm$ 13.0   | 37.4 $\pm$ 12.0  | 23.5 $\pm$ 14.7   | 46.3 $\pm$ 21.6   | 26.1 $\pm$ 8.2   |
| <b>Biological Factors</b>                 |                              |                   |                  |                   |                   |                  |                   |                   |                  |
| Patient's                                 | Participating Patients       | 52                | 5                | 86                | 100               | 12               | 34                | 64                | 19               |
|                                           | Age (years)                  | 42.3 $\pm$ 12.0   | 39.2 $\pm$ 9.6   | 40.7 $\pm$ 13.2   | 46.8 $\pm$ 11.8   | 41.0 $\pm$ 12.1  | 40.3 $\pm$ 10.7   | 45.8 $\pm$ 12.5   | 50.5 $\pm$ 10.9  |
|                                           | Sex (female)                 | 32 (61.5%)        | 4 (80%)          | 28 (32.6%)        | 46 (46%)          | 0 (0%)           | 17 (50%)          | 20 (31.3%)        | 9 (47.4%)        |
|                                           | Height (cm)                  | 174.6 $\pm$ 10.4  | 168.0 $\pm$ 5.8  | 174.3 $\pm$ 7.2   | 174.5 $\pm$ 8.8   | 181.7 $\pm$ 7.5  | 167.2 $\pm$ 11.7  | 173.9 $\pm$ 9.5   | 163.5 $\pm$ 6.1  |
|                                           | Weight (kg)                  | 81.2 $\pm$ 16.6   | 65.6 $\pm$ 16.7  | 80.4 $\pm$ 17.4   | 86.1 $\pm$ 18.4   | 96.1 $\pm$ 24.6  | 78.9 $\pm$ 15.6   | 88.6 $\pm$ 19.5   | 58.2 $\pm$ 9.3   |
|                                           | BMI (kg/m <sup>2</sup> )     | 26.5 $\pm$ 4.4    | 23.2 $\pm$ 5.6   | 26.4 $\pm$ 5.0    | 28.2 $\pm$ 5.5    | 29.0 $\pm$ 7.0   | 28.4 $\pm$ 5.9    | 29.2 $\pm$ 5.7    | 21.7 $\pm$ 2.8   |
|                                           | Affected Body Area           |                   |                  |                   |                   |                  |                   |                   |                  |
|                                           | Low Back                     | 19 (36.5%)        | 1 (20%)          | 27 (31.4%)        | 43 (43%)          | 0 (0%)           | 11 (32.3%)        | 22 (34.4%)        | 10 (52.6%)       |
|                                           | Lower Extremity              | 1 (1.9%)          | 0 (0%)           | 15 (17.4%)        | 11 (11%)          | 6 (50%)          | 7 (20.6%)         | 18 (28.1%)        | 8 (42.1%)        |
|                                           | Upper Extremity              | 2 (3.8%)          | 0 (0%)           | 9 (10.5%)         | 4 (4%)            | 5 (41.7%)        | 5 (14.7%)         | 16 (25%)          | 1 (5.3%)         |
|                                           | Neck                         | 14 (27%)          | 2 (40%)          | 14 (16.3%)        | 17 (17%)          | 0 (0%)           | 3 (8.8%)          | 3 (4.7%)          | 0 (0%)           |
|                                           | Generalized                  | 16 (30.8%)        | 2 (40%)          | 21 (24.4%)        | 25 (25%)          | 1 (8.3%)         | 7 (20.6%)         | 4 (6.3%)          | 0 (0%)           |
|                                           | Other                        | 0 (0%)            | 0 (0%)           | 0 (0%)            | 0 (0%)            | 0 (0%)           | 1 (2.9%)          | 1 (1.6%)          | 0 (0%)           |
|                                           | Floor-to-Waist Lift Test     |                   |                  |                   |                   |                  |                   |                   |                  |
|                                           | Observed Physical Effort     |                   |                  |                   |                   |                  |                   |                   |                  |
|                                           | Light to Moderate            | 12 (23.1%)        | 4 (80%)          | 10 (11.6%)        | 7 (7%)            | 0 (0%)           | 8 (23.5%)         | 49 (76.6%)        | 2 (10.5%)        |
|                                           | Heavy                        | 26 (50.0%)        | 0 (0%)           | 11 (12.8%)        | 39 (39%)          | 0 (0%)           | 4 (11.8%)         | 14 (21.9%)        | 12 (63.2%)       |
|                                           | Maximum                      | 14 (26.9%)        | 1 (20%)          | 63 (73.3%)        | 54 (54%)          | 12 (100%)        | 20 (58.8%)        | 1 (1.6%)          | 5 (26.3%)        |
|                                           | Test Ended Prematurely (yes) | 25 (48.1%)        | 2 (40%)          | 21 (24.4%)        | 46 (46%)          | 0 (0%)           | 8 (23.5%)         | 22 (34.4%)        | 0 (0%)           |
|                                           | Six-Minute Walk Test         |                   |                  |                   |                   |                  |                   |                   |                  |
|                                           | Test Prematurely Ended (yes) | 0 (0%)            | 0 (0%)           | 9 (11.3%)         | 1 (1%)            | 0 (0%)           | 2 (5.9%)          | 6 (9.4%)          | 0 (0%)           |
| <b>Psychological Factors</b>              |                              |                   |                  |                   |                   |                  |                   |                   |                  |
| Patient-                                  | Pain Intensity (NRS) (0-10)  | 5 (2-7)           | 7 (4-8)          | 4.5 (3-6)         | 6 (4-7)           | 3 (1.3-5)        | 8 (5-9)           | 5 (3-6.8)         | 5 (3-5)          |

|                                               |                                                     |                              | NL             | CA           | CH               | DE            | AT            | ZA             | NZ             | CN          |
|-----------------------------------------------|-----------------------------------------------------|------------------------------|----------------|--------------|------------------|---------------|---------------|----------------|----------------|-------------|
| Reported                                      | Pain Duration                                       | Less than ½ year             | 9 (17.3%)      | 0 (0%)       | 16 (18.6%)       | 23 (23%)      | 5 (41.7%)     | 2 (5.9%)       | 6 (9.4%)       | 3 (15.8%)   |
|                                               |                                                     | ½ - 1 year                   | 12 (23.1%)     | 3 (60%)      | 25 (29.1%)       | 30 (30%)      | 3 (25%)       | 2 (5.9%)       | 10 (15.6%)     | 10 (52.6%)  |
|                                               |                                                     | 1 - 2 years                  | 11 (21.2%)     | 1 (20%)      | 15 (17.4%)       | 15 (15%)      | 3 (25%)       | 5 (14.7%)      | 13 (20.3%)     | 6 (31.6%)   |
|                                               |                                                     | 2 - 3 years                  | 7 (13.5%)      | 0 (0%)       | 6 (7.0%)         | 21 (21%)      | 1 (8.3%)      | 9 (26.5%)      | 10 (15.6%)     | 0 (0%)      |
|                                               |                                                     | 3 - 10 years                 | 7 (13.5%)      | 1 (20%)      | 16 (18.6%)       | 9 (9%)        | 0 (0%)        | 12 (35.3%)     | 19 (29.7%)     | 0 (0%)      |
|                                               |                                                     | More than 10 years           | 5 (9.6%)       | 0 (0%)       | 7 (8.1%)         | 2 (2%)        | 0 (0%)        | 0 (0%)         | 6 (9.4%)       | 0 (0%)      |
|                                               | Effort during Floor-to-Waist Lift Test (Borg CR-10) |                              | 7.4 ± 1.9      | 5.4 ± 2.4    | 6.5 ± 1.8        | 7.0 ± 2.0     | 5.8 ± 1.9     | 8.3 ± 1.6      | 4.8 ± 2.5      | 5.7 ± 1.8   |
|                                               | Effort during Six-Minute Walk Test (Borg CR-10)     |                              | 4.4 ± 2.2      | 6.0 ± 0.7    | 4.5 ± 2.3        | 6.3 ± 1.7     | 4 ± 1.9       | 6.4 ± 2.3      | 4.3 ± 2.9      | 4.3 ± 2.1   |
|                                               | Screening Questionnaire                             | Anxiety (0-10)               | 2 (1-5)        | 4 (2-9.5)    | 1 (0-5)          | 3 (1-5)       | 0.5 (0-2.5)   | 5.5 (3-8)      | 4 (2-7)        | 6 (5-7)     |
|                                               |                                                     | Social Isolation (0-10)      | 1 (1-3)        | 6 (4-7.5)    | 0.5 (0-3)        | 2 (0-4.8)     | 0 (0-0)       | 6 (1.8-9)      | 4 (1-6)        | 5 (3-6)     |
|                                               |                                                     | Catastrophizing (0-10)       | 3.5 (1.5-6)    | 4 (2.5-8.5)  | 3.5 (1.5-6)      | 5.5 (3.5-7.4) | 1 (0.5-4)     | 7.8 (3.4-9)    | 4.5 (2-7)      | 5.5 (3-7)   |
|                                               |                                                     | Depression (0-10)            | 3 (1.5-5.5)    | 4 (2.3-8.3)  | 3.5 (1.5-6)      | 5 (2-6)       | 0 (0-1.8)     | 7.3 (3.4-9)    | 4 (2-6.5)      | 4.5 (3-6)   |
|                                               |                                                     | Fear of Movement (0-10)      | 4 (2-6.5)      | 4 (1.3-6)    | 3 (1-5.5)        | 5 (3.5-6.5)   | 0.5 (0-1)     | 7.5 (5-9.6)    | 4.8 (3-7.9)    | 4.5 (2.5-5) |
|                                               | Self-Reported Disability (PDI) (0-70)               |                              | 29.5 (20-45.5) | 43 (16-54.5) | 28.5 (20.8-36.5) | 29 (15-39)    | 16.5 (7-22.5) | 43 (27.8-53.3) | 34 (23.3-46.8) | 30 (21-37)  |
|                                               | Family / Home Responsibilities (0-10)               |                              | 5 (2-7.5)      | 7 (1-8)      | 4.5 (3-6.3)      | 5 (3-7)       | 4 (1.3-5)     | 6 (4-8)        | 5 (3-7)        | 5 (3-6)     |
|                                               | Recreation (0-10)                                   |                              | 6 (3-8)        | 7 (1-8.5)    | 6 (3-8)          | 5 (3-7.3)     | 2 (1.3-3.8)   | 8 (5-9.3)      | 7 (4-8)        | 5 (5-5)     |
|                                               | Social Activity (0-10)                              |                              | 5 (1-8)        | 7 (3.5-9)    | 4 (2-6)          | 4 (1-6)       | 1.5 (0.3-2.8) | 6 (3.8-8.3)    | 5.5 (3-7)      | 4 (3-5)     |
|                                               | Occupation (0-10)                                   |                              | 6 (5-8)        | 8 (2.5-10)   | 7 (5-9)          | 6 (3.3-8)     | 5 (1.3-7.5)   | 7 (4-9)        | 7 (5-8)        | 5 (3-6)     |
|                                               | Sexual Behaviour (0-10)                             |                              | 3 (0.8-6)      | 5 (4-7)      | 4 (1-6)          | 4 (1-5)       | 0 (0-1.8)     | 7 (2.8-8)      | 4 (2-8)        | 4 (0-6)     |
|                                               | Self-Care (0-10)                                    |                              | 2 (0-4.8)      | 4 (1-7)      | 2 (0-4)          | 2 (0-4)       | 0 (0-1.8)     | 5 (2-7.3)      | 5 (2-6)        | 4 (2-5)     |
| Life-Support Activity (0-10)                  |                                                     | 2.5 (0-5)                    | 5 (0.5-7.5)    | 1 (0-3.3)    | 2 (0-4)          | 0 (0-2)       | 5 (1.8-7)     | 2 (0.3-5)      | 4 (3-5)        |             |
| Work Ability Index – Single Item (WAS) (0-10) |                                                     | 5 (3-6)                      | 3 (1-6.5)      | 4 (2-6)      | 4 (2-6)          | 7 (5.3-8)     | 4 (0.8-6)     | 3 (2-5)        | 5 (4-7)        |             |
| <b>Social Factors</b>                         |                                                     |                              |                |              |                  |               |               |                |                |             |
| Patient's                                     | Living Country                                      | Same as Measurement Country  | 52 (100%)      | 5 (100%)     | 86 (100%)        | 100 (100%)    | 12 (100%)     | 34 (100%)      | 64 (100%)      | 19 (100%)   |
|                                               |                                                     | Other                        | 0 (0%)         | 0 (0%)       | 0 (0%)           | 0 (0%)        | 0 (0%)        | 0 (0%)         | 0 (0%)         | 0 (0%)      |
|                                               | Cultural background <sup>b</sup>                    | Same as Measurement Country  | 51 (98.1%)     | 4 (80%)      | 59 (68.6%)       | 92 (92%)      | 9 (75%)       | 34 (100%)      | 55 (85.9%)     | 19 (100%)   |
|                                               |                                                     | Other                        | 1 (1.9%)       | 1 (20%)      | 27 (31.4%)       | 8 (8%)        | 3 (25%)       | 0 (0%)         | 9 (14.1%)      | 0 (0%)      |
|                                               | Mother Language <sup>c</sup>                        | Official Language in Country | 51 (98.1%)     | 4 (80%)      | 76 (88.4%)       | 94 (94%)      | 8 (66.7%)     | 34 (100%)      | 61 (95.3%)     | 19 (100%)   |
|                                               |                                                     | Other                        | 1 (1.9%)       | 1 (20%)      | 10 (11.6%)       | 6 (6%)        | 4 (33.3%)     | 0 (0%)         | 3 (4.7%)       | 0 (0%)      |
|                                               | Marital status                                      | Single                       | 12 (23.1%)     | 1 (20%)      | 39 (45.3%)       | 20 (20%)      | 3 (25%)       | 14 (41.2%)     | 9 (14.1%)      | 0 (0%)      |
|                                               |                                                     | Living Together              | 7 (13.5%)      | 0 (0%)       | 0 (0%)           | 0 (0%)        | 0 (0%)        | 0 (0%)         | 0 (0%)         | 0 (0%)      |
|                                               |                                                     | Married                      | 28 (53.8%)     | 3 (60%)      | 31 (36.0%)       | 59 (59%)      | 5 (41.7%)     | 15 (44.1%)     | 38 (59.4%)     | 18 (94.7%)  |
|                                               |                                                     | Common Law                   | 0 (0%)         | 1 (20%)      | 0 (0%)           | 4 (4%)        | 3 (25%)       | 0 (0%)         | 6 (9.4%)       | 0 (0%)      |
|                                               |                                                     | Separated                    | 0 (0%)         | 0 (0%)       | 0 (0%)           | 0 (0%)        | 0 (0%)        | 4 (11.8%)      | 2 (3.1%)       | 0 (0%)      |
|                                               |                                                     | Divorced                     | 4 (7.7%)       | 0 (0%)       | 14 (16.3%)       | 14 (14%)      | 1 (8.3%)      | 1 (2.9%)       | 7 (10.9%)      | 1 (5.3%)    |
|                                               | Educational Level                                   | Widowed                      | 1 (1.9%)       | 0 (0%)       | 2 (2.3%)         | 3 (3%)        | 0 (0%)        | 0 (0%)         | 2 (3.1%)       | 0 (0%)      |
|                                               |                                                     | No Degree                    | 0 (0%)         | 0 (0%)       | 0 (0%)           | 2 (2%)        | 0 (0%)        | 0 (0%)         | 6 (9.4%)       | 0 (0%)      |
|                                               |                                                     | Elementary Education         | 3 (5.8%)       | 1 (20%)      | 10 (11.6%)       | 0 (0%)        | 3 (25%)       | 1 (2.9%)       | 13 (20.3%)     | 4 (21.1%)   |
|                                               |                                                     | High-school Education        | 10 (19.2%)     | 0 (0%)       | 15 (17.4%)       | 36 (36%)      | 0 (0%)        | 22 (64.7%)     | 20 (31.3%)     | 15 (78.9%)  |
|                                               |                                                     | Vocational Training          | 27 (51.9%)     | 2 (40%)      | 59 (68.6%)       | 56 (56%)      | 6 (75%)       | 8 (23.5%)      | 18 (28.1%)     | 0 (0%)      |
|                                               |                                                     | Bachelor                     | 9 (17.3%)      | 1 (0%)       | 1 (1.2%)         | 5 (5%)        | 0 (0%)        | 3 (8.8%)       | 7 (10.9%)      | 0 (0%)      |
|                                               | Physical Work Demands (DOT)                         | Master                       | 2 (3.8%)       | 1 (20%)      | 1 (1.2%)         | 1 (1%)        | 0 (0%)        | 0 (0%)         | 0 (0%)         | 0 (0%)      |
|                                               |                                                     | Doctorate                    | 1 (1.9%)       | 0 (0%)       | 0 (0%)           | 0 (0%)        | 0 (0%)        | 0 (0%)         | 0 (0%)         | 0 (0%)      |
| Sedentary                                     |                                                     | 13 (25.0%)                   | 1 (20%)        | 10 (11.6%)   | 7 (7%)           | 0 (0%)        | 8 (23.5%)     | 5 (7.8%)       | 1 (5.3%)       |             |
| Light                                         |                                                     | 8 (15.4%)                    | 2 (20%)        | 15 (17.4%)   | 22 (22%)         | 0 (0%)        | 11 (32.4%)    | 12 (18.8%)     | 7 (36.8%)      |             |
| Medium                                        | 19 (36.5%)                                          | 2 (40%)                      | 18 (20.9%)     | 39 (39%)     | 3 (25%)          | 5 (14.7%)     | 27 (42.2%)    | 4 (21.1%)      |                |             |
| Heavy                                         | 10 (19.2%)                                          | 0 (0%)                       | 21 (24.4%)     | 25 (25%)     | 7 (58.3%)        | 6 (17.6%)     | 16 (25%)      | 4 (21.1%)      |                |             |

|                                                |                                            | NL                 | CA           | CH             | DE            | AT               | ZA                | NZ         | CN          |           |
|------------------------------------------------|--------------------------------------------|--------------------|--------------|----------------|---------------|------------------|-------------------|------------|-------------|-----------|
| WorkStatus                                     | Very Heavy                                 | 2 (3.8%)           | 0 (0%)       | 22 (25.6%)     | 7 (7%)        | 2 (16.7%)        | 0 (0%)            | 4 (6.3%)   | 3 (15.8%)   |           |
|                                                | Working on Regular Duty                    | 14 (26.9%)         | 0 (0%)       | 7 (8.1%)       | 27 (27%)      | 0 (0%)           | 9 (26.5%)         | 2 (3.1%)   | 0 (0%)      |           |
|                                                | Working on Modified Duty                   | 8 (15.4%)          | 0 (0%)       | 1 (1.2%)       | 6 (6%)        | 0 (0%)           | 3 (8.8%)          | 13 (20.3%) | 1 (5.3%)    |           |
|                                                | Working on Reduced Duty                    | 11 (21.2%)         | 1 (20%)      | 8 (9.3%)       | 0 (0%)        | 0 (0%)           | 0 (0%)            | 2 (3.1%)   | 0 (0%)      |           |
|                                                | On Full Sick-Leave                         | 16 (30.8%)         | 0 (0%)       | 58 (67.4%)     | 67 (67%)      | 8 (66.7%)        | 13 (38.2%)        | 4 (6.3%)   | 17 (89.5%)  |           |
|                                                | Unemployed                                 | 1 (1.9%)           | 2 (40%)      | 7 (8.1%)       | 0 (0%)        | 4 (33.3%)        | 9 (26.5%)         | 27 (42.2%) | 1 (5.3%)    |           |
|                                                | On Disability Allowance                    | 2 (3.8%)           | 2 (40%)      | 4 (4.7%)       | 0 (0%)        | 0 (0%)           | 0 (0%)            | 14 (21.9%) | 0 (0%)      |           |
|                                                | Other                                      | 0 (0%)             | 0 (0%)       | 1 (1.2%)       | 0 (0%)        | 0 (0%)           | 0 (0%)            | 2 (3.1%)   | 0 (0%)      |           |
|                                                | Days Off Work                              | No days off        | 24 (46.2%)   | 0 (0%)         | 9 (10.5%)     | 27 (27%)         | 0 (0%)            | 1 (2.9%)   | 3 (4.7%)    | 0 (0%)    |
|                                                | Less than ¼ year                           | 12 (23.1%)         | 1 (20%)      | 23 (26.7%)     | 13 (13%)      | 0 (0%)           | 7 (20.6%)         | 4 (6.3%)   | 0 (0%)      |           |
| ¼ - ½ year                                     | 6 (11.5%)                                  | 0 (0%)             | 18 (20.9%)   | 22 (22%)       | 5 (41.7%)     | 6 (17.6%)        | 9 (14.1%)         | 3 (15.8%)  |             |           |
| ½ - 1 year                                     | 6 (11.5%)                                  | 4 (80%)            | 17 (19.8%)   | 25 (25%)       | 3 (25%)       | 6 (17.6%)        | 14 (21.9%)        | 10 (52.6%) |             |           |
| 1 – 2 years                                    | 4 (7.7%)                                   | 0 (0%)             | 9 (10.5%)    | 11 (11%)       | 3 (25%)       | 3 (8.8%)         | 11 (17.2%)        | 6 (31.6%)  |             |           |
| More than 2 years                              | 0 (0%)                                     | 0 (0%)             | 9 (10.5%)    | 2 (2%)         | 1 (8.3%)      | 7 (20.6%)        | 23 (35.9%)        | 0 (0%)     |             |           |
| Compensated (yes)                              |                                            | 37 (71.2%)         | 3 (60%)      | 65 (75.6%)     | 49 (49%)      | 11 (91.7%)       | 17 (50%)          | 63 (98.4%) | 18 (94.7%)  |           |
| Amount of Compensation                         | At 0%                                      | 15 (28.8%)         | 0 (0%)       | 21 (24.4%)     | 51 (51%)      | 1 (8.3%)         | 17 (50%)          | 1 (1.6%)   | 1 (5.3%)    |           |
|                                                | Less than 50%                              | 0 (0%)             | 0 (0%)       | 3 (3.5%)       | 0 (0%)        | 0 (0%)           | 0 (0%)            | 6 (9.4%)   | 0 (0%)      |           |
|                                                | Between 50 and 74%                         | 8 (15.4%)          | 1 (20%)      | 5 (5.8%)       | 19 (19%)      | 1 (8.3%)         | 1 (2.9%)          | 6 (9.4%)   | 0 (0%)      |           |
|                                                | Between 75and 99%                          | 0 (0%)             | 1 (20%)      | 40 (46.5%)     | 20 (20%)      | 9 (75%)          | 10 (29.4%)        | 51 (79.7%) | 17 (89.5%)  |           |
|                                                | Full or at 100%                            | 29 (55.8%)         | 0 (0%)       | 17 (19.8%)     | 10 (10%)      | 1 (8.3%)         | 6 (17.6%)         | 0 (0%)     | 1 (5.3%)    |           |
| Clinician's Participating Clinicians           |                                            | 4                  | 2            | 22             | 14            | 5                | 4                 | 1          | 2           |           |
| Participating Facilities                       |                                            | 2                  | 1            | 3              | 6             | 1                | 3                 | 1          | 1           |           |
| Age (years)                                    |                                            | 42.8 ± 12.1        | 37.5 ± 14.8  | 39.0 ± 9.3     | 45.1 ± 8.8    | 38.8 ± 7.4       | 35 ± 8.9          | 68         | 37 ± 17.0   |           |
| Sex (female)                                   |                                            | 3 (75%)            | 1 (50%)      | 14 (63.6%)     | 5 (35.7%)     | 3 (60%)          | 3 (75%)           | 0 (0%)     | 1 (50%)     |           |
| Profession                                     | Physical Therapist                         | 3 (75%)            | 0 (0%)       | 20 (90.9%)     | 11 (78.6%)    | 3 (60%)          | 0 (0%)            | 1 (100%)   | 0 (0%)      |           |
|                                                | Occupational Therapist                     | 1 (25%)            | 1 (50%)      | 2 (9.1%)       | 0 (0%)        | 2 (40%)          | 4 (100%)          | 0 (0%)     | 2 (100%)    |           |
|                                                | Other                                      | 0 (0%)             | 1 (50%)      | 0 (0%)         | 3 (21.4%)     | 0 (0%)           | 0 (0%)            | 0 (0%)     | 0 (0%)      |           |
| Experience                                     | Years as Professional                      | 22 (8.5-31.8)      | 15 (4-)      | 14.5 (6-20)    | 17 (9.8-20.3) | 10.5 (9.8-21.5)  | 11 (4.3-20.8)     | 45         | 13.8 (3.5-) |           |
|                                                | Years as FCE Assessor                      | 3 (2.3-3)          | 13 (4-)      | 5.5 (2.9-10.3) | 8 (4.5-10.5)  | 8.5 (7.5-11.5)   | 6.5 (1.3-14.8)    | 19         | 7.3 (1.5-)  |           |
|                                                | N° FCE in the Last 2 Years <sup>a</sup>    | 52 (26.3-113.8)    | 10           | 24.5 (15-50)   | 90 (30-105)   | 15 (13.5-25)     | 214.5 (137.3-285) | 200        | 775 (750-)  |           |
| Pain Beliefs (Adapted BBQ) (9-45) <sup>a</sup> | 38.5 (35.3-41.8)                           | 45                 | 42 (39.5-44) | 39.5 (35.8-43) | 37 (28.5-40)  | 35.5 (34.3-36.8) | 41                | 41 (40-)   |             |           |
| FCE Purpose                                    | Admission for Rehabilitation               | 22 (42.3%)         | 0 (0%)       | 0 (0%)         | 100 (100%)    | 0 (0%)           | 0 (0%)            | 0 (0%)     | 9 (47.4%)   |           |
|                                                | (Pre-) employment Assessment               | 2 (3.8%)           | 0 (0%)       | 0 (0%)         | 0 (0%)        | 0 (0%)           | 0 (0%)            | 0 (0%)     | 0 (0%)      |           |
|                                                | Return-to-Work                             | 22 (42.3%)         | 3 (60%)      | 67 (77.9%)     | 0 (0%)        | 12 (100%)        | 7 (20.6%)         | 39 (60.9%) | 9 (47.4%)   |           |
|                                                | Case Settlement                            | 3 (5.8%)           | 0 (0%)       | 7 (8.1%)       | 0 (0%)        | 0 (0%)           | 19 (55.9%)        | 3 (4.7%)   | 0 (0%)      |           |
|                                                | Determine Disability                       | 3 (5.8%)           | 2 (40%)      | 12 (14.0%)     | 0 (0%)        | 0 (0%)           | 8 (23.5%)         | 22 (34.4%) | 0 (0%)      |           |
|                                                | Other                                      | 0 (0%)             | 0 (0%)       | 0 (0%)         | 0 (0%)        | 0 (0%)           | 0 (0%)            | 0 (0%)     | 1 (5.3%)    |           |
|                                                | Direct Influence on Financial Status (yes) | 0 (0%)             | 4 (80%)      | 66 (76.7%)     | 0 (0%)        | 12 (100%)        | 34 (100%)         | 63 (98.4%) | 0 (0%)      |           |
| Type of Protocol                               | WorkWell                                   | 52 (100%)          | 0 (0%)       | 86 (100.0%)    | 100 (100%)    | 12 (100%)        | 34 (100%)         | 0 (0%)     | 0 (0%)      |           |
|                                                | WEST-EPIC                                  | 0 (0%)             | 5 (100%)     | 0 (0%)         | 0 (0%)        | 0 (0%)           | 0 (0%)            | 0 (0%)     | 19 (100%)   |           |
|                                                | Blankenship                                | 0 (0%)             | 0 (0%)       | 0 (0%)         | 0 (0%)        | 0 (0%)           | 0 (0%)            | 64 (100%)  | 0 (0%)      |           |
| Floor-to-Waist Lift Performance                | Ending Reason                              | Normal End of Test | 12 (23.1%)   | 1 (20%)        | 1 (1.2%)      | 54 (54%)         | 0 (0%)            | 25 (73.5%) | 34 (53.1%)  | 19 (100%) |
|                                                | Maximal Allowed HR was Reached             | 10 (19.2%)         | 0 (0%)       | 0 (0%)         | 0 (0%)        | 0 (0%)           | 0 (0%)            | 0 (0%)     | 0 (0%)      |           |
|                                                | Evaluator's Decision: Safety               | 7 (13.5%)          | 0 (0%)       | 5 (5.8%)       | 10 (10%)      | 0 (0%)           | 0 (0%)            | 0 (0%)     | 0 (0%)      |           |
|                                                | Evaluator's Decision: Max. Capacity        | 5 (9.6%)           | 2 (40%)      | 57 (66.3%)     | 5 (5%)        | 12 (100%)        | 1 (2.9%)          | 1 (1.6%)   | 0 (0%)      |           |
|                                                | Patient's Decision                         | 16 (30.8%)         | 2 (40%)      | 23 (26.7%)     | 18 (18%)      | 0 (0%)           | 7 (20.6%)         | 29 (45.3%) | 0 (0%)      |           |

|                                  |                                     | NL         | CA       | CH         | DE       | AT        | ZA         | NZ         | CN        |
|----------------------------------|-------------------------------------|------------|----------|------------|----------|-----------|------------|------------|-----------|
| Other: Maximum time exceeded     |                                     | 2 (3.8%)   | 0 (0%)   | 0 (0%)     | 0 (0%)   | 0 (0%)    | 0 (0%)     | 0 (0%)     | 0 (0%)    |
| Six Minute Walk Test Performance |                                     |            |          |            |          |           |            |            |           |
| Ending Reason                    | Normal End of Test                  | 39 (75.0%) | 5 (100%) | 58 (67.4%) | 11 (11%) | 12 (100%) | 32 (94.1%) | 58 (90.6%) | 19 (100%) |
|                                  | Maximal Allowed HR was Reached      | 0 (0%)     | 0 (0%)   | 0 (0%)     | 0 (0%)   | 0 (0%)    | 0 (0%)     | 0 (0%)     | 0 (0%)    |
|                                  | Evaluator's Decision: Safety        | 0 (0%)     | 0 (0%)   | 0 (0%)     | 0 (0%)   | 0 (0%)    | 0 (0%)     | 0 (0%)     | 0 (0%)    |
|                                  | Evaluator's Decision: Max. Capacity | 0 (0%)     | 0 (0%)   | 20 (23.3%) | 1 (1%)   | 0 (0%)    | 0 (0%)     | 0 (0%)     | 0 (0%)    |
|                                  | Patient's Decision                  | 0 (0%)     | 0 (0%)   | 8 (9.3%)   | 0 (0%)   | 0 (0%)    | 2 (5.9%)   | 6 (9.4%)   | 0 (0%)    |

Abbreviations: NL, The Netherlands; CA, Canada; CH, Switzerland; DE, Germany; AT, Austria; ZA, South Africa; NZ, New Zealand; CN, China; BMI, Body Mass Index; HR, Heart-Rate; DOT, Dictionary of Occupational Titles; PDI, Pain Disability Index; NRS, Numeric Rating Scale; WAS, Work Ability Score; FCE, Functional Capacity Evaluation; BBQ, Back Beliefs Questionnaire.

<sup>a</sup> median (IQR 25-75) values are given.

<sup>b</sup> Cultural Background measured as Nationality.

<sup>c</sup> Switzerland and South Africa have more than one official language: Switzerland = German (n=69), Italian (n=4), French (n=3); South Africa = Afrikaans (n=9), English (n=8), Sepedi (n=1), SeSotho (n=7), IsiZulu (n=7), Swazi (n=1), Tswana (n=1).

Other in Patient's Affected Body Area: South Africa = Thoracic Spine (n=1); New Zealand = Pelvic Floor Paralysis ex childbirth (n=1).

Other in Patient's Cultural Background: The Netherlands = Turkish (n=1); Canada = Chinese (n=1); Switzerland = Austrian (n=4), Congolese (n=1), German (n=7), Italian (n=4), Kosovar (n=2), Liechtensteiner (n=4), Macedonian (n=1), Portuguese (n=1), Serbian (n=1), Spanish (n=1), Turkish (n=1); Germany = Albanian (n=1), Italian (n=2), Polish (n=1), Russian (n=1), Serbian (n=1), Turkish (n=2); Austria= Croatian (n=1), German (n=1), Romanian (n=1); New Zealand = American (n=1), Chinese (n=1), Fijian-Indian (n=1), Indian (n=3), Iraqi (n=1), Tongan (n=2).

Other in Patient's Mother Language: The Netherlands = Ukrainian (n=1); Canada = Chinese (n=1); Switzerland = Albanian (n=5), Croatian (n=1), Serbian (n=1), Tamil (n=1), Turkish (n=2); Germany = Albanian (n=1), Panjabi (n=1), Polish (n=1), Serbian (n=1), Turkish (n=2); Austria = Bosnian (n=1), Croatian (n=1), Romanian (n=1), Serbian (n=1); New Zealand = Chinese (n=1), Tongan (n=2).

Other in Patient's Work Status: Switzerland = Student (n=1); New Zealand = Student (n=1), Voluntary job (n=1).

Other in FCE Purpose: China = Review work capacity for job duties suggestion (n=1).

Other in Clinician's Profession: Canada = Kinesiologist (n=1); Germany = Sports Scientist (n=1), Sports Teacher (n=2).
